# Supplementary material for: Global Transcriptomic Analysis of the Candida albicans Response to Treatment with a Novel Inhibitor of Filamentation
Source: PubMed Central journal article supplement (PMC6739497; doi:10.1128/msphere.00620-19), 2019-09-11

**Supplementary Figure S1. Confirmatory qRT-PCR analysis of hyphal specific genes differentially expressed during treatment with compound 9029936 .** Levels of expression of *PHO84*, *ALS3* and *HWP1* were measured by qRT-PCR in order to confirm results from RNA-Sequencing experiments. The primers used were TTTGTTGGGTTTGTTCGTCA (forward) and GCAATAATGGCACC GACTTT (reverse) for *PHO84*, CAACTTGGGTTATTGAAACAAAAACA (forward) and AGAAACAGAAACCCAAGAACAACCT (reverse) for *ALS3*, and TCAGCCTGATGACAATCCTC (forward) and GCTGGAGTTGTTGGCTTTTC (reverse) for *HWP1*. \*\*P < 0.0015; \*\*\*P < 0.0008; \*\*\*\*P < 0.0001.

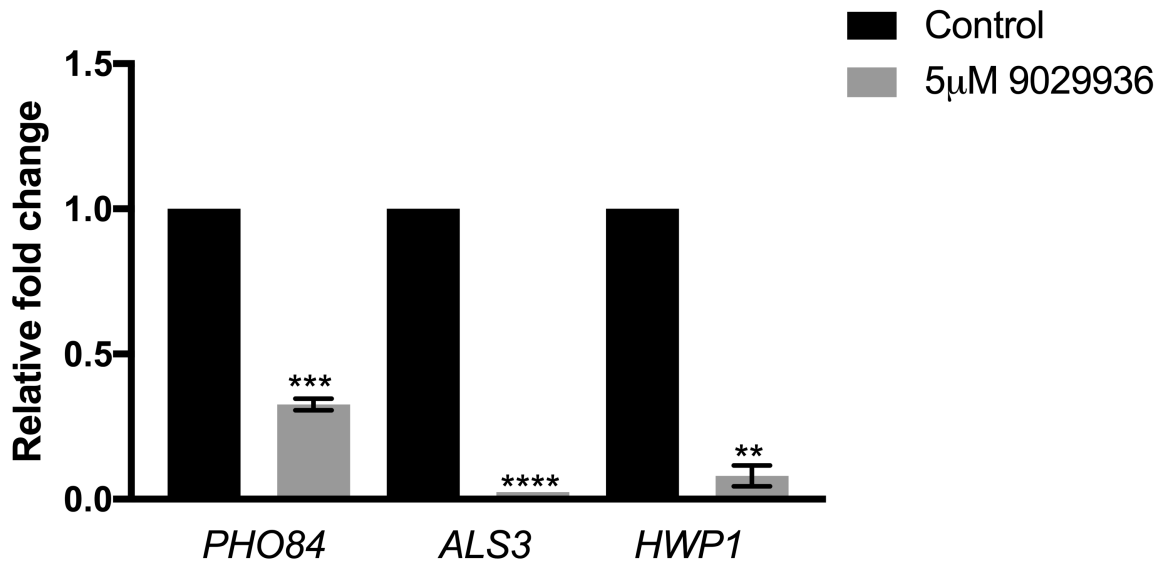

Supplement: mSphere.00620-19-sf001.pdf [file mSphere.00620-19-sf001.pdf]
