# Supplementary material for: Global Transcriptomic Analysis of the Candida albicans Response to Treatment with a Novel Inhibitor of Filamentation
Source: PubMed Central journal article supplement (PMC6739497; doi:10.1128/msphere.00620-19), 2019-09-11
Supplement: mSphere.00620-19-st001.pdf [file mSphere.00620-19-st001.pdf]

**Supplementary Table S1.** Sequenced reads obtained from the sample set from RNA sequencing experiments.

| Paired reads                 |                     |            |                     |            |                     |            |                     |            |                     |            |                     |            |
|------------------------------|---------------------|------------|---------------------|------------|---------------------|------------|---------------------|------------|---------------------|------------|---------------------|------------|
|                              | Treated rep 1       |            | Treated rep 2       |            | Treated rep 3       |            | Control rep 1       |            | Control rep 2       |            | Control rep 3       |            |
|                              | Number of sequences | % of total | Number of sequences | % of total | Number of sequences | % of total | Number of sequences | % of total | Number of sequences | % of total | Number of sequences | % of total |
| Unique reads mapped in pairs | 36641248            | 90.96      | 34694588            | 90.06      | 34208830            | 89.72      | 31710950            | 91.18      | 34099796            | 91.77      | 36043446            | 90.85      |
| Reads mapped                 | 38764952            | 96.23      | 36896654            | 95.78      | 36886772            | 96.75      | 33534907            | 96.43      | 35897847            | 96.61      | 38545644            | 97.16      |
| Total reads after “trim”     | 40283710            | 100        | 38523364            | 100        | 38127258            | 100        | 34777084            | 100        | 37158658            | 100        | 39674006            | 100        |
